# Supplementary material for: A genome-scale metabolic model of potato late blight suggests a photosynthesis suppression mechanism
Source: PubMed Central journal article supplement (PMC6288859; doi:10.1186/s12864-018-5192-x), 2018-12-11
Supplement: 12864_2018_5192_MOESM3_ESM.pdf [file 12864_2018_5192_MOESM3_ESM.pdf]

## Supplementary Table S2

Reaction fluxes of the metabolic pathways of interest in *S. tuberosum* to evaluate photosynthetic capacity through compatible interaction with *P. infestans*.

| Pathways                               | Reaction (ID KEGG) | Metabolic flux (0 dpi) | Metabolic flux (2 dpi) | Metabolic flux (3 dpi) |
|----------------------------------------|--------------------|------------------------|------------------------|------------------------|
| <b>Biomass Synthesis</b>               | RBS01              | 1,313856               | 0,9435836              | 0,8790459              |
| <b>Cyclic Photophosphorylation</b>     | RK0004             | 0                      | 0                      | 0                      |
| <b>Non Cyclic Photophosphorylation</b> | RK0005             | 1,630357               | 1,408214               | 1,35                   |
| <b>Carbon Fixation</b>                 | R00024             | 46,38961               | 14,34539               | 25,7072                |
|                                        | R01512             | 19,59667               | 0                      | 0                      |
|                                        | R01061<br>*rev     | -45,65                 | 5,326667               | -1,176667              |
|                                        | R01015             | 17,39                  | 8,923333               | 0                      |
|                                        | R01068<br>*rev     | -5,79                  | -13,63667              | 0                      |
|                                        | R00762             | 5,79667                | 13,63667               | 0                      |
|                                        | R01067             | 5,79667                | 13,63667               | 0                      |
|                                        | R01829             | 5,79667                | 12,67667               | 0                      |
|                                        | R01845             | 5,79667                | 12,67667               | 13,94333               |
|                                        | R01641             | 25,52                  | 12,91333               | 10,93469               |
|                                        | R01056             | -5,036667              | -2,386667              | -2,251979              |
|                                        | R01523             | 46,3891                | 25,61669               | 25,7072                |
|                                        | R01529<br>*rev     | -51,426                | -28,00336              | -25,65781              |
|                                        | R01051             | -5,036667              | -3,62                  | -5,69                  |
| <b>Photorespiration</b>                | R03140             | 0                      | 11,2713                | 0                      |
|                                        | R01334             | 0                      | 11,2713                | 0                      |
|                                        | R00475             | 0                      | 39,43                  | 0                      |
|                                        | R00009             | 0                      | 36,37207               | 3,992193               |
|                                        | R00372             | 0                      | 0                      | 65,06771               |
|                                        | R00945             | -40,9                  | 2,556667               | -2,646667              |
|                                        | R01221             | 28,57                  | 10,43925               | 14,86955               |
|                                        | R00588             | 693,29                 | 1543,01                | 854,7267               |
|                                        | R01388             | -4,417                 | -3,146667              | -19,57333              |
|                                        | R01514             | 0                      | 0                      | 0                      |
| <b>AGPase activity</b>                 | R00948             | 0.3481719              | 0.2500497              | 0.2329472              |
| <b>Starch Synthesis</b>                | R02110             | 26,29711               | 0,25                   | 5,42                   |
| <b>Salicylic Acid Synthesis</b>        | RK0003             | 0                      | 0                      | 0                      |

\* rev = The direction of the metabolic flux in the metabolic pathway is reversed
